# Supplementary material for: Eugenol Essential Oil and Nanoemulsion as Antihydatic Agents with Antifibrotic and Immunomodulatory Effects in Cystic Echinococcosis
Source: MDPI journal article supplement (doi:10.3390/tropicalmed8050253), 2023-04-27
Supplement: s1 [file s1]

## Supplementary materials

Table S1 : Eugenol and eugenol nanoemulsion effects on rat's liver weight.

| GROUPS                       | Liver average Wt. (gm) | <i>P</i> -value** |              |              |
|------------------------------|------------------------|-------------------|--------------|--------------|
| 1. Uninfected Control        | 5.58 ± 0.3             | 1 vs 2<0.001      | 2 vs 7<0.001 | 4 vs 6<0.001 |
| 2. Infected Control CE       | 15.11 ± 0.9            | 1 vs 3=0.005      | 2 vs 8<0.001 | 4 vs 7=0.001 |
| 3. Infected treated Eug-NE   | 7.04 ± 0.6             | 1 vs 4=0.002      | 3 vs 4=0.049 | 4 vs 8<0.001 |
| 4. Infected treated Eug      | 7.79 ± 0.5             | 1 vs 5<0.001      | 3 vs 5=0.002 | 5 vs 6<0.001 |
| 5. Infected treated ABZ.     | 8.80 ± 0.5             | 2 vs 3<0.001      | 3 vs 6=0.008 | 5 vs 7<0.001 |
| 6. Uninfected treated Eug    | 5.96 ± 0.3             | 2 vs 4<0.001      | 3 vs 7=0.010 | 5 vs 8<0.001 |
| 7. Uninfected treated Eug-NE | 5.85 ± 0.3             | 2 vs 5<0.001      | 3 vs 8=0.004 |              |
| 8. Uninfected treated ABZ.   | 5.87 ± 0.4             | 2 vs 6<0.001      | 4 vs 5=0.015 |              |
| <i>P</i> -value*             | < 0.001                |                   |              |              |

\*One Way ANOVA

\*\*Post-hoc test

*P*-value< 0.05 was considered significant.

**Table S2 : Eugenol and eugenol nanoemulsion effects on rat's liver hypertrophy indicator.**

| GROUPS                       | Liver hypertrophy indicator (%) | P-value**    |              |              |
|------------------------------|---------------------------------|--------------|--------------|--------------|
| 1. Uninfected Control        | 29.25 ± 1.4                     | 1 vs 2<0.001 | 2 vs 7<0.001 | 4 vs 6<0.001 |
| 2. Infected Control CE       | 78.70 ± 4.8                     | 1 vs 3=0.004 | 2 vs 8<0.001 | 4 vs 7=0.001 |
| 3. Infected treated Eug-NE   | 35.57 ± 3.0                     | 1 vs 4=0.001 | 3 vs 4=0.042 | 4 vs 8<0.001 |
| 4. Infected treated Eug      | 39.55 ± 2.6                     | 1 vs 5<0.001 | 3 vs 5=0.001 | 5 vs 6<0.001 |
| 5. Infected treated ABZ.     | 45.14 ± 2.7                     | 2 vs 3<0.001 | 3 vs 6=0.006 | 5 vs 7<0.001 |
| 6. Uninfected treated Eug    | 29.80 ± 1.5                     | 2 vs 4<0.001 | 3 vs 7=0.008 | 5 vs 8<0.001 |
| 7. Uninfected treated Eug-NE | 29.24 ± 1.7                     | 2 vs 5<0.001 | 3 vs 8=0.003 |              |
| 8. Uninfected treated ABZ.   | 29.34 ± 1.9                     | 2 vs 6<0.001 | 4 vs 5=0.011 |              |
| P-value*                     | < 0.001                         |              |              |              |

\*One Way ANOVA

\*\*Post-hoc test

P-value< 0.05 was considered significant.

**Table S3 : Eugenol and eugenol nanoemulsion effects on rat's lung weight.**

| GROUPS                       | Lung average Wt. (gm) | P-value**    |              |              |
|------------------------------|-----------------------|--------------|--------------|--------------|
| 1. Uninfected Control        | 1.49 ± 0.1            | 1 vs 2<0.001 | 2 vs 7<0.001 | 4 vs 7<0.001 |
| 2. Infected Control CE       | 3.57 ± 0.3            | 1 vs 3<0.001 | 2 vs 8<0.001 | 4 vs 8<0.001 |
| 3. Infected treated Eug-NE   | 1.99 ± 0.1            | 1 vs 4<0.001 | 3 vs 4=0.005 | 5 vs 6<0.001 |
| 4. Infected treated Eug      | 2.50 ± 0.2            | 1 vs 5<0.001 | 3 vs 5=0.001 | 5 vs 7<0.001 |
| 5. Infected treated ABZ.     | 2.73 ± 0.2            | 2 vs 3<0.001 | 3 vs 6<0.001 | 5 vs 8<0.001 |
| 6. Uninfected treated Eug    | 1.45 ± 0.1            | 2 vs 4=0.003 | 3 vs 7<0.001 |              |
| 7. Uninfected treated Eug-NE | 1.37 ± 0.1            | 2 vs 5=0.004 | 3 vs 8<0.001 |              |
| 8. Uninfected treated ABZ.   | 1.31 ± 0.1            | 2 vs 6<0.001 | 4 vs 6<0.001 |              |
| P-value*                     | < 0.001               |              |              |              |

\*One Way ANOVA

\*\*Post-hoc test

P-value< 0.05 was considered significant.

**Table S4 : Eugenol and eugenol nanoemulsion effects on rat's lung hypertrophy indicator.**

| <b>GROUPS</b>                       | <b>Lung hypertrophy indicator (%)</b> | <b><i>P</i>-value**</b> |              |              |
|-------------------------------------|---------------------------------------|-------------------------|--------------|--------------|
| <b>1. Uninfected Control</b>        | 7.46 ± 0.4                            | 1 vs 2<0.001            | 2 vs 7<0.001 | 4 vs 7<0.001 |
| <b>2. Infected Control CE</b>       | 17.98 ± 1.4                           | 1 vs 3<0.001            | 2 vs 8<0.001 | 4 vs 8<0.001 |
| <b>3. Infected treated Eug-NE</b>   | 9.97 ± 0.7                            | 1 vs 4<0.001            | 3 vs 4=0.005 | 5 vs 6<0.001 |
| <b>4. Infected treated Eug</b>      | 12.52 ± 1.1                           | 1 vs 5<0.001            | 3 vs 5=0.001 | 5 vs 7<0.001 |
| <b>5. Infected treated ABZ.</b>     | 13.79 ± 1.1                           | 2 vs 3<0.001            | 3 vs 6<0.001 | 5 vs 8<0.001 |
| <b>6. Uninfected treated Eug</b>    | 7.27 ± 0.6                            | 2 vs 4=0.002            | 3 vs 7<0.001 |              |
| <b>7. Uninfected treated Eug-NE</b> | 6.84 ± 0.6                            | 2 vs 5=0.004            | 3 vs 8<0.001 |              |
| <b>8. Uninfected treated ABZ.</b>   | 6.53 ± 0.4                            | 2 vs 6<0.001            | 4 vs 6<0.001 |              |
| <b><i>P</i>-value*</b>              | = 0.004                               |                         |              |              |

\*One Way ANOVA

\*\*Post-hoc test

*P*-value< 0.05 was considered significant.
